# Supplementary material
Source: PubMed Central journal article supplement (PMC1782368)
Supplement: 7601480s9.pdf [file 7601480s9.pdf]

**Supplemental Table S1. Transgenic Rescue of Runx1 Mutant Embryos**

---

| stages  | <i>Runx1</i> <sup>-/-</sup> |      | <i>Runx1</i> <sup>-/-</sup> ::Tg (348) |      | <i>Runx1</i> <sup>-/-</sup> ::Tg (428) |      |
|---------|-----------------------------|------|----------------------------------------|------|----------------------------------------|------|
|         | alive                       | dead | alive                                  | dead | alive                                  | dead |
| E11.5   | 0                           | 6    | 3                                      | 0    | —                                      | —    |
| E12.5   | 3                           | 9    | 5                                      | 0    | 2                                      | 1    |
| E13.5   | 0                           | 5    | 5                                      | 0    | —                                      | —    |
| E14.5   | 0                           | 6    | 8                                      | 8    | 0                                      | 4    |
| E15.5   | 0                           | 4    | 0                                      | 2    | —                                      | —    |
| E16.5   | —                           | —    | 2                                      | 2    | —                                      | —    |
| E17.5   | —                           | —    | 2                                      | 0    | —                                      | —    |
| E18.5   | 0                           | 3    | 1                                      | 5    | 10                                     | 3    |
| Newborn | —                           | —    | —                                      | —    | 0                                      | 1    |

---

*Runx1*<sup>-/-</sup> embryos died by E12.5 without the *G1-HRD-Runx1* transgene. Two lines (348 and 428) of *G1-HRD-Runx1* transgenic mice partially rescued the embryonic lethality of *Runx1*-deficient embryos when crossed.
