# Supplementary material
Source: PubMed Central journal article supplement (PMC1782368)

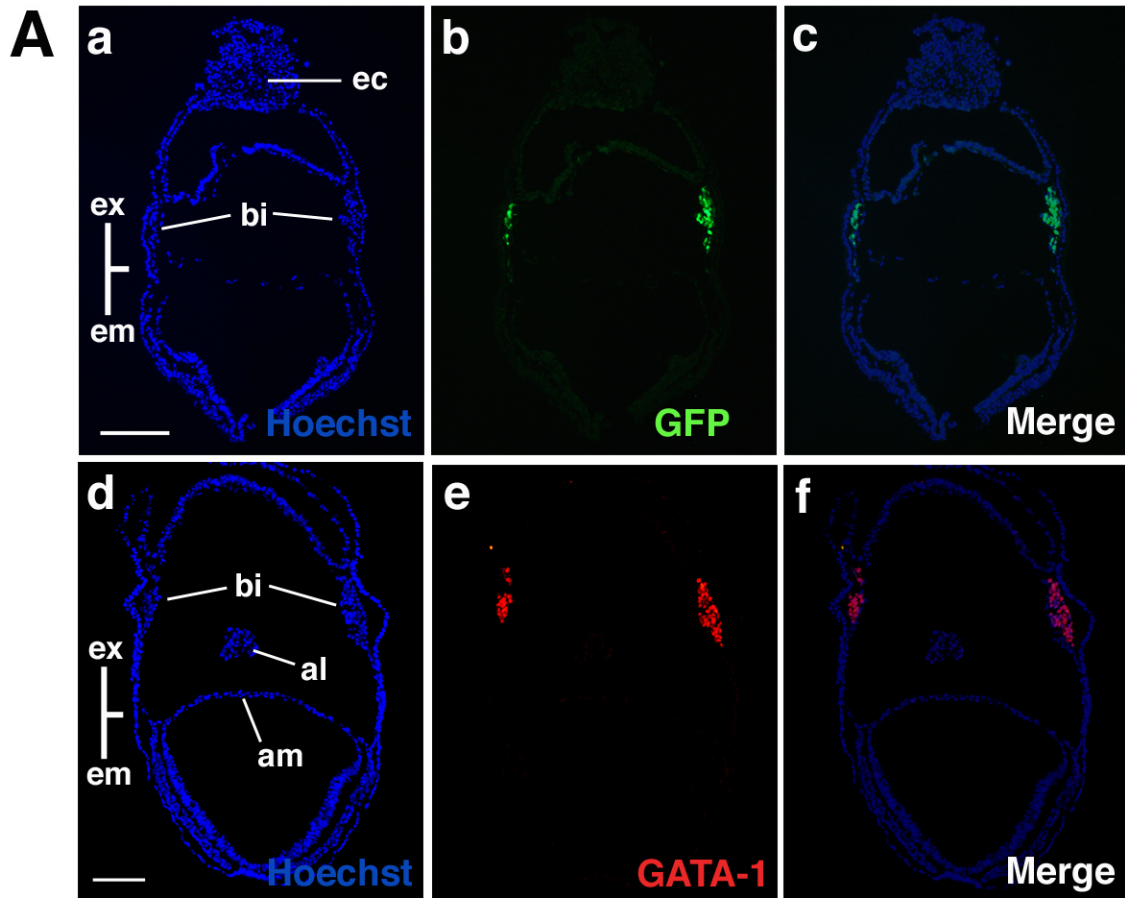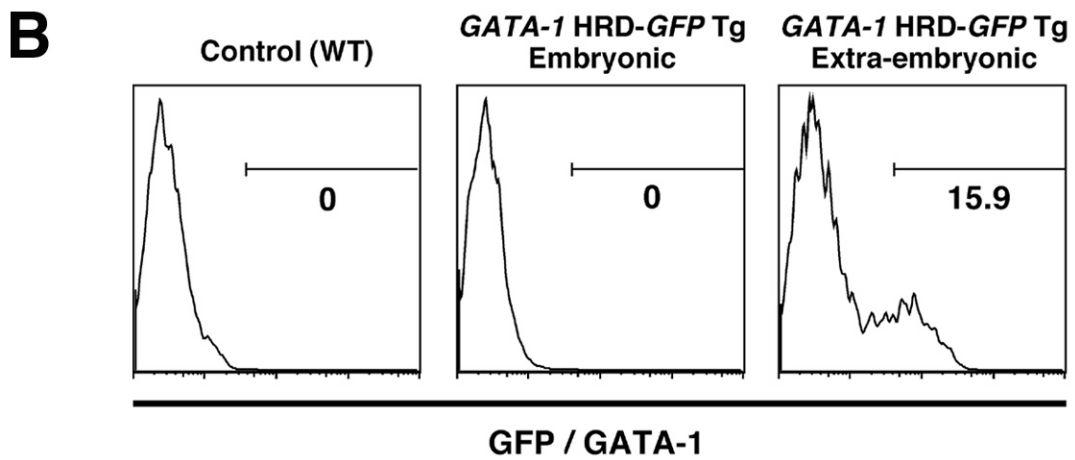

Supplemental Figure S1 T. Yokomizo et al.

Supplement: 7601480s1.pdf [file 7601480s1.pdf]

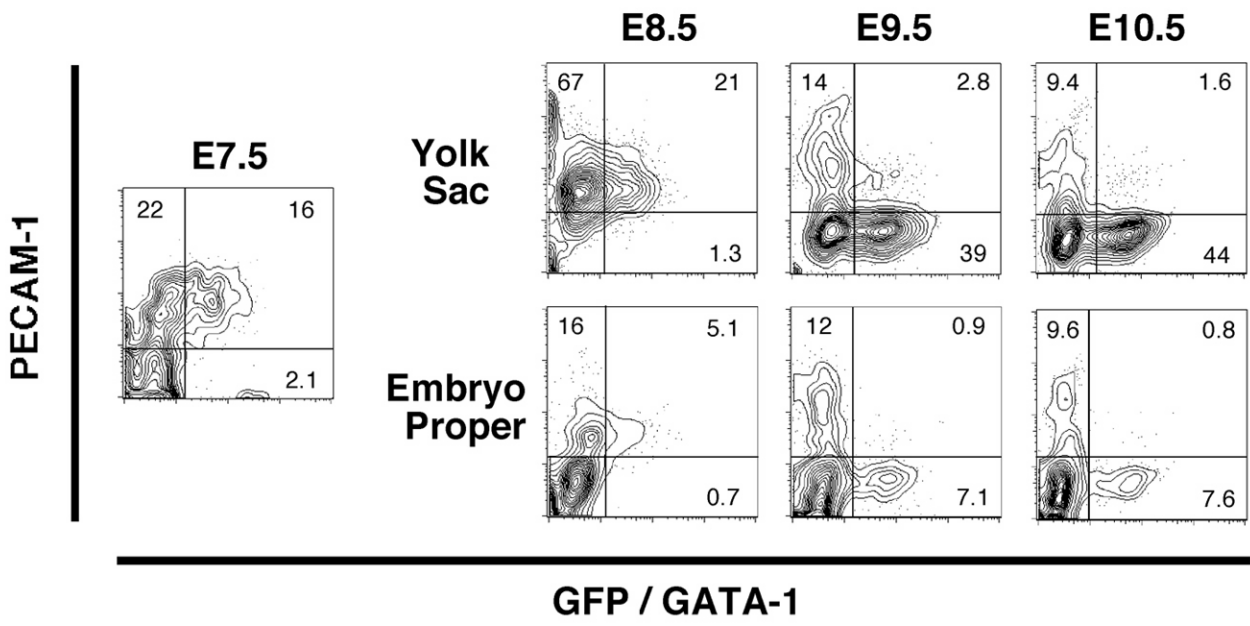

**Supplemental Figure S2 T.Yokomizo et al.**

Supplement: 7601480s2.pdf [file 7601480s2.pdf]

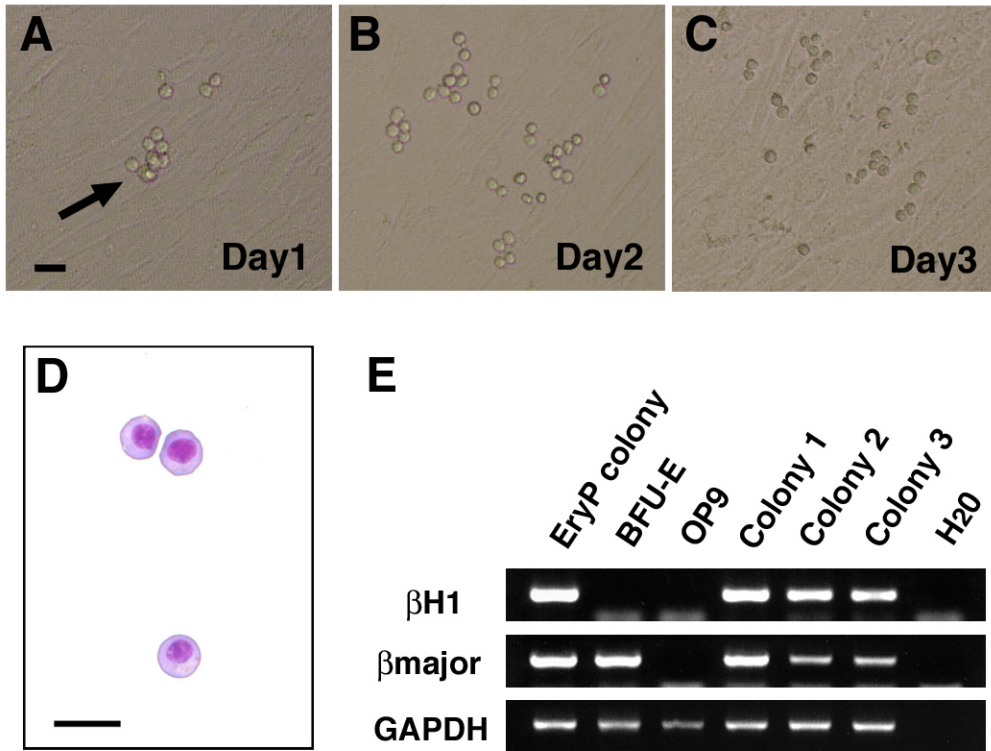

**Supplemental Figure S3 T. Yokomizo et al.**

Supplement: 7601480s3.pdf [file 7601480s3.pdf]

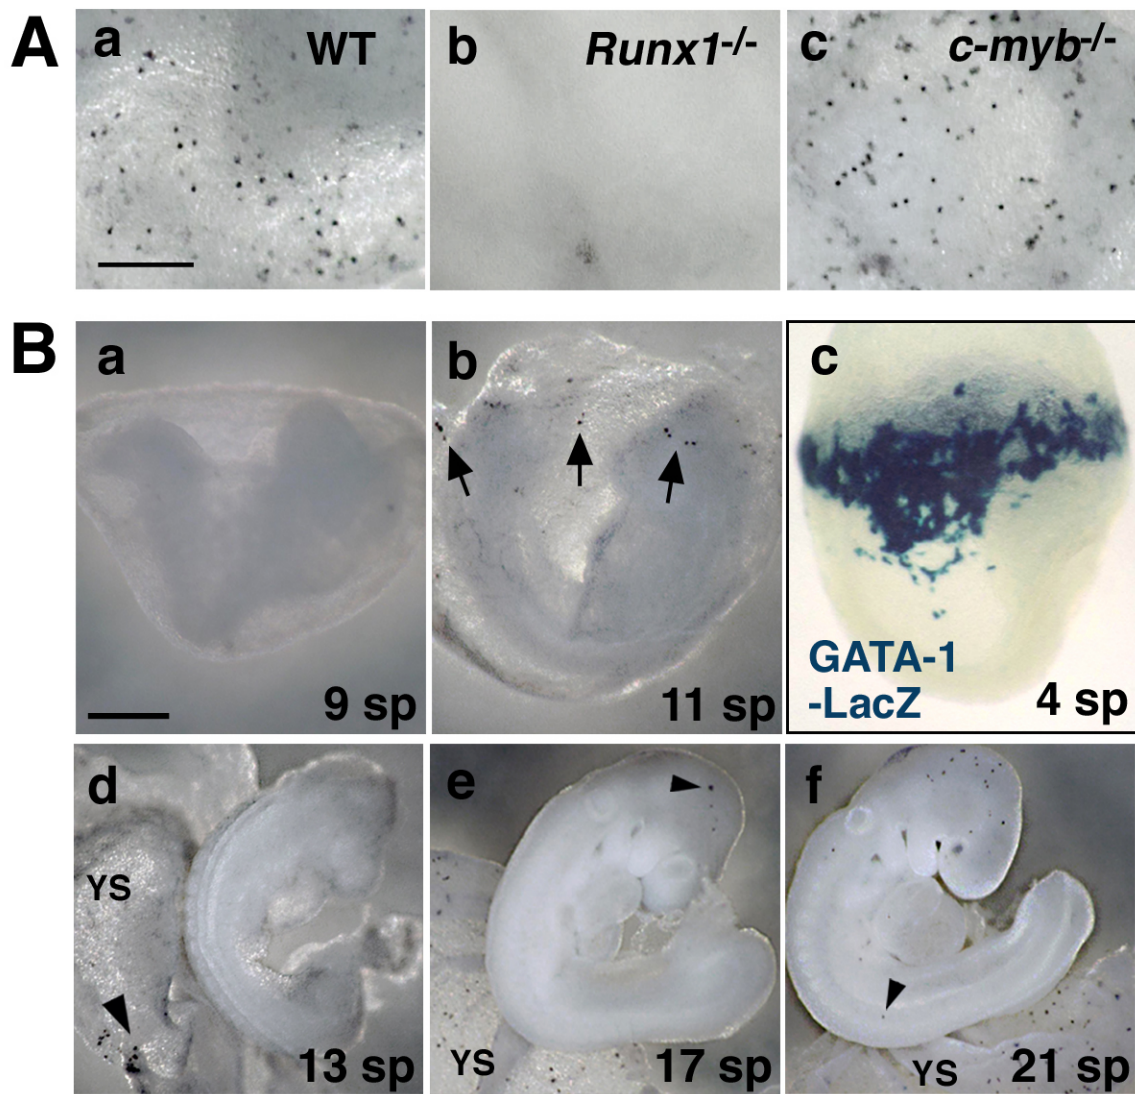

Supplemental Figure S4 T. Yokomizo et al.

Supplement: 7601480s4.pdf [file 7601480s4.pdf]

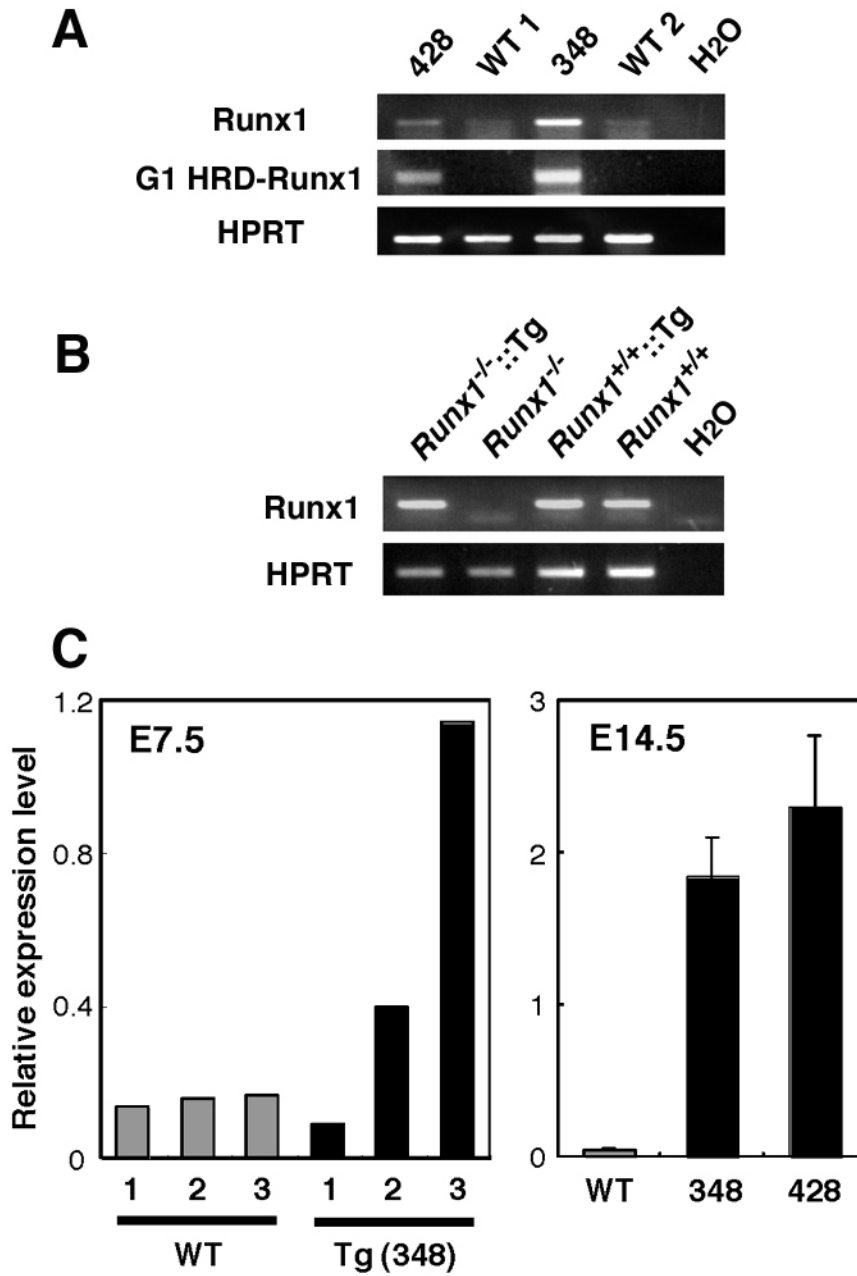

Supplement: 7601480s5.pdf [file 7601480s5.pdf]

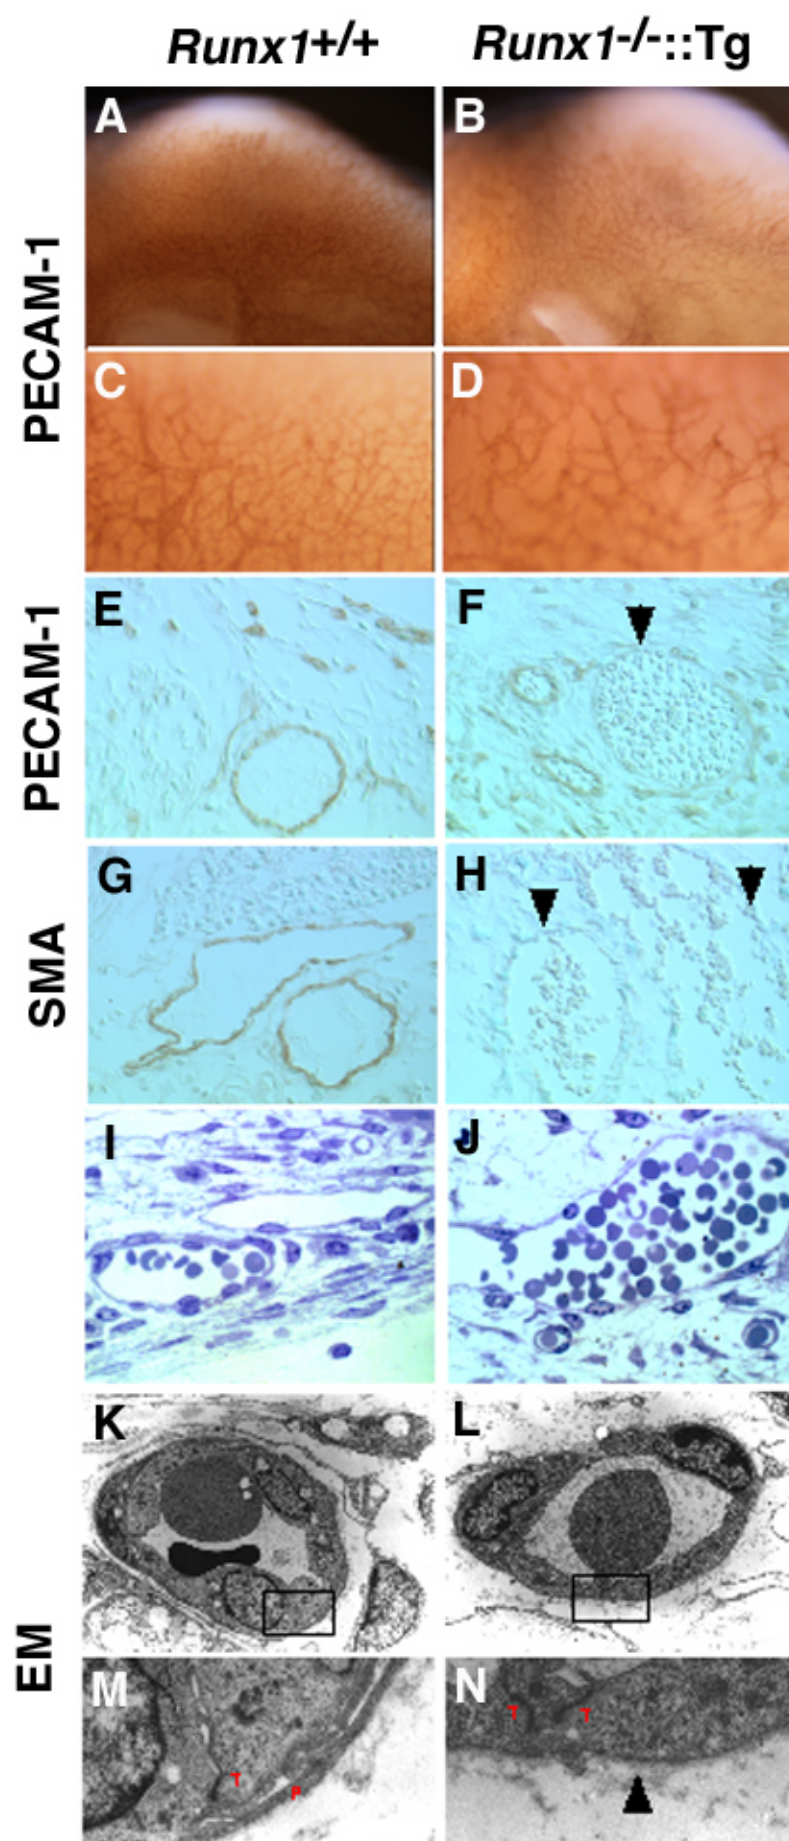

Supplemental Figure S6 T. Yokomizo et al.

Supplement: 7601480s6.pdf [file 7601480s6.pdf]

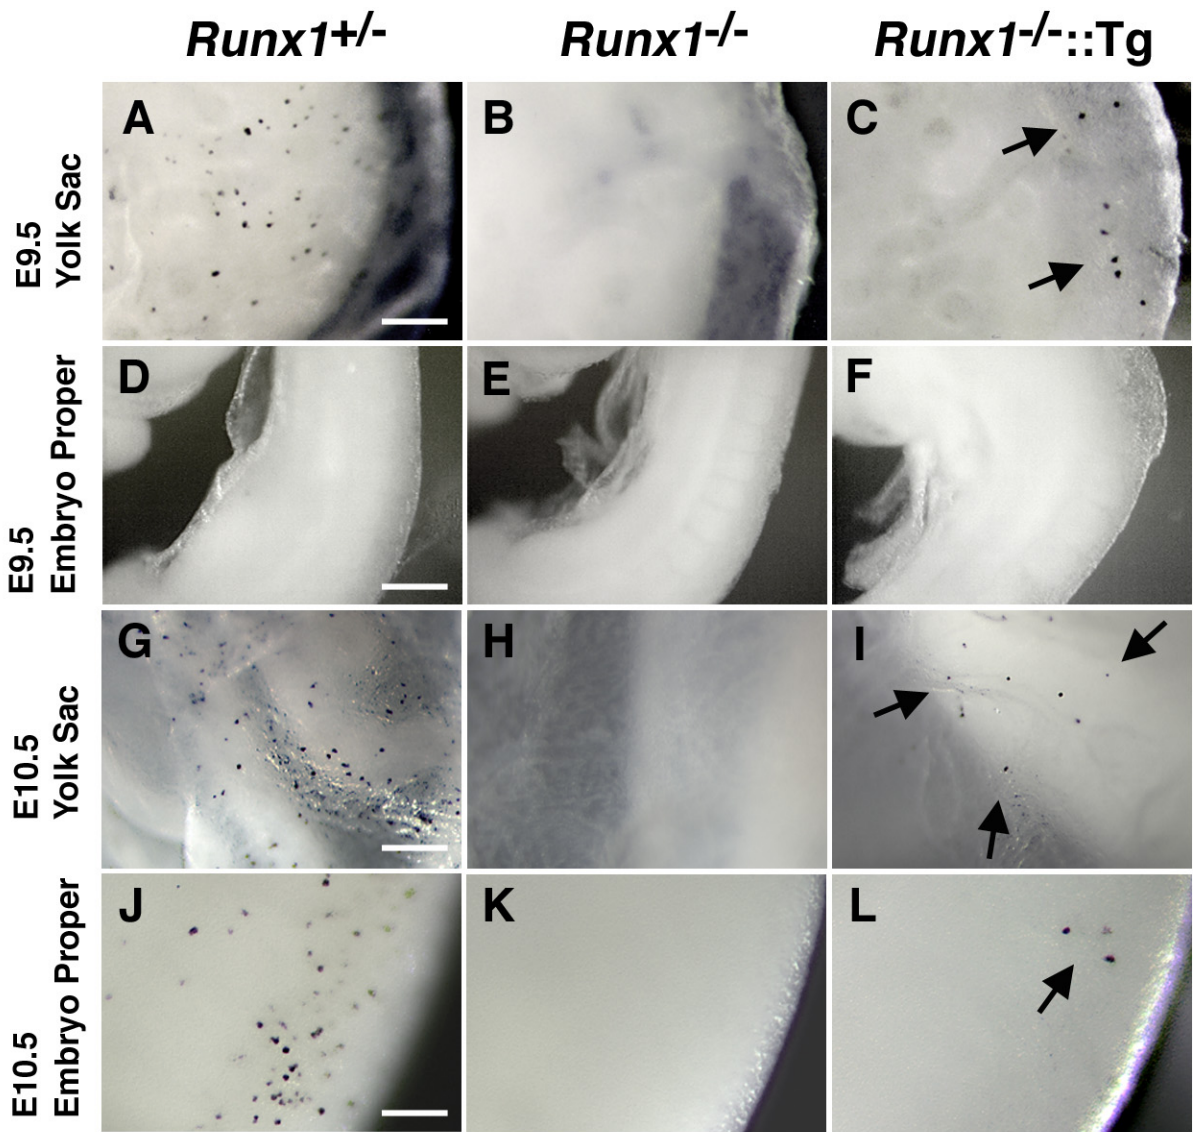

Supplemental Figure S7 T. Yokomizo et al.

Supplement: 7601480s7.pdf [file 7601480s7.pdf]

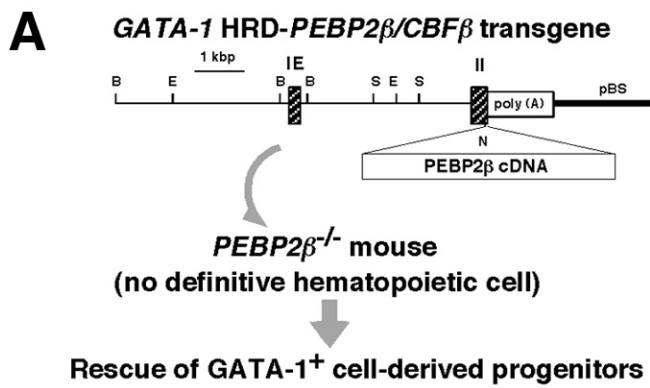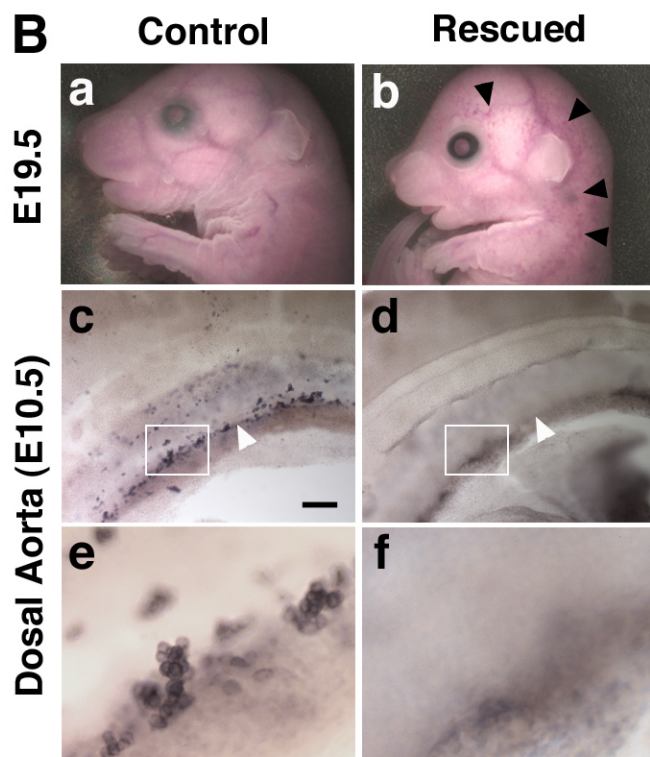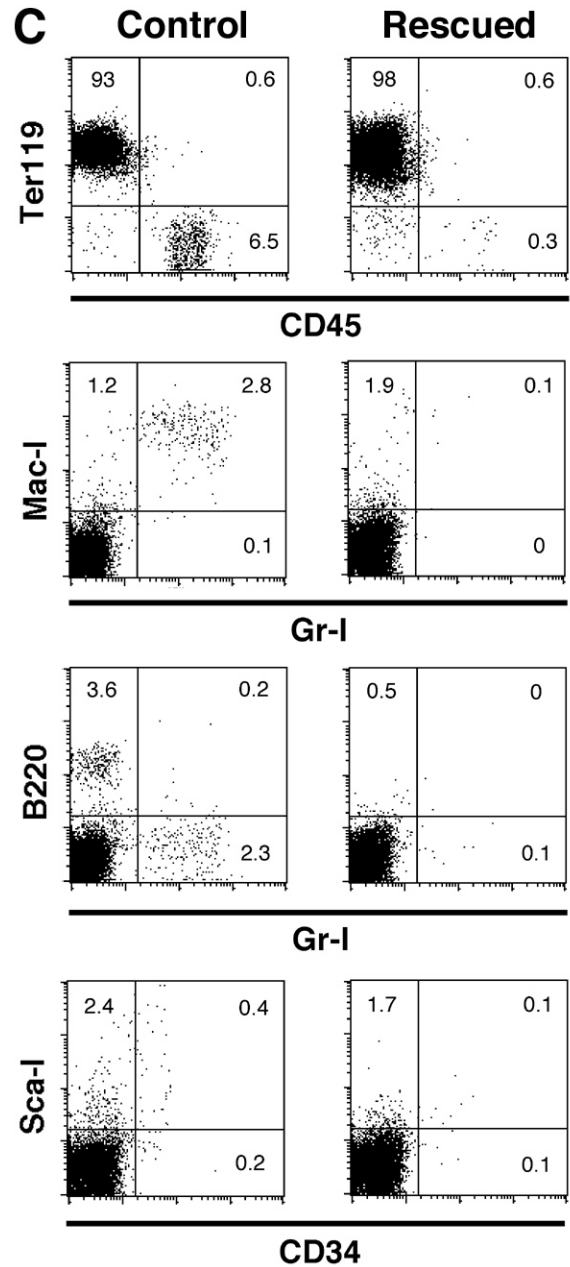

Supplement: 7601480s8.pdf [file 7601480s8.pdf]
